# Supplementary material
Source: Springer Nature journal article supplement (https://www.springermedizin.de/resource/supplementary/12872_2010_371_MOESM3_ESM.pdf/9429794)

**Sensitivity**

**SROC Curve**

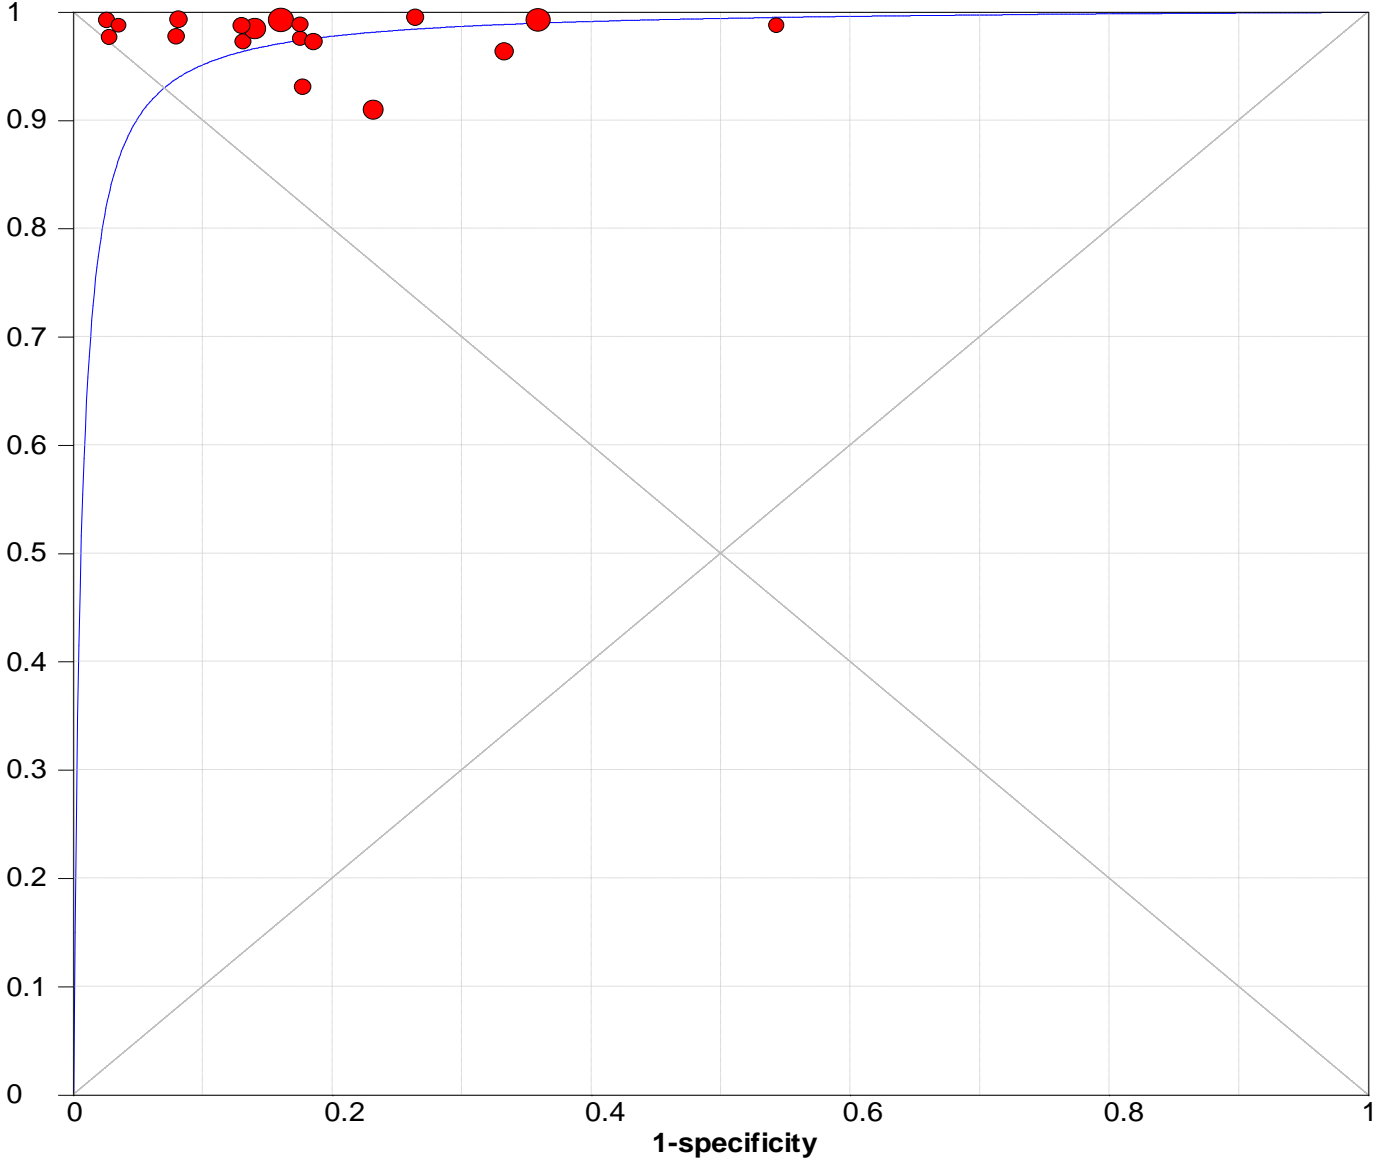

**Symmetric SROC**  
AUC = 0.9761  
SE(AUC) = 0.0138  
Q\* = 0.9301  
SE(Q\*) = 0.0243

Supplement: MOESM3 [file 9429794]
